# Supplementary material
Source: Springer Nature journal article supplement (https://www.springermedizin.de/resource/supplementary/12885_2013_4811_MOESM1_ESM.pdf/9467426)
Supplement: MOESM1 [file 9467426]

**Additional file 1: Knockdown of HSP70/MRJ modulates cytoskeleton reorganization.** HCT116 mock cells were transfected with psiHSP70 or psiMRJ.

F-actin was visualized with Texas Red-X phalloidin. Scale bar = 20  $\mu$ m.

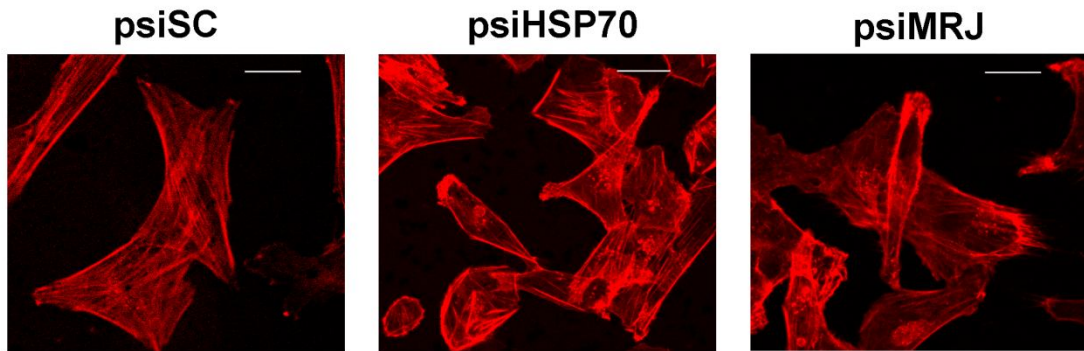

**HCT116 mock cell (high level uPAR)**
